# Supplementary material
Source: MDPI journal article supplement (https://www.mdpi.com/2413-4155/4/1/7)
Supplement: s1 [file s1]

**Malonaldehyde-like systems:BeF<sub>2</sub> clusters. A subtle balance between hydrogen bonds, beryllium bonds and resonance.**

M. Merced Montero-Campillo, Otilia Mó and Manuel Yáñez

Departamento de Química, Módulo 13, Facultad de Ciencias and Institute of Advanced Chemical Sciences (IAdChem). Universidad Autónoma de Madrid. Campus de Excelencia UAM-CSIC. Cantoblanco. 28049-Madrid

## **Supporting Information**

### **CONTENTS**

**Figure S1.** Optimized structures of malonaldehyde-like ( X = O; Y = S ) complexes with BeF<sub>2</sub>. Bond lengths are in Å. Atom color code: C, grey; H: white; O: red; S: mustard yellow; Be: lemon yellow; F: light blue. Page 2

**Figure S2.** Optimized structures of malonaldehyde-like (X = O; Y = NH ) complexes with BeF<sub>2</sub>. Bond lengths are in Å. Same conventions as in Figure S1. Page 3

**Figure S3.** Optimized structures of malonaldehyde-like (X = S; Y = NH ) complexes with BeF<sub>2</sub>. Bond lengths are in Å. Same conventions as in Figure S1. Page 4

**Figure S4.** Molecular graphs of the complexes in which the BeF<sub>2</sub> molecule interacts with the imino forms of the complexes in which X = O, S. Electron densities at the bond critical points are in a.u.

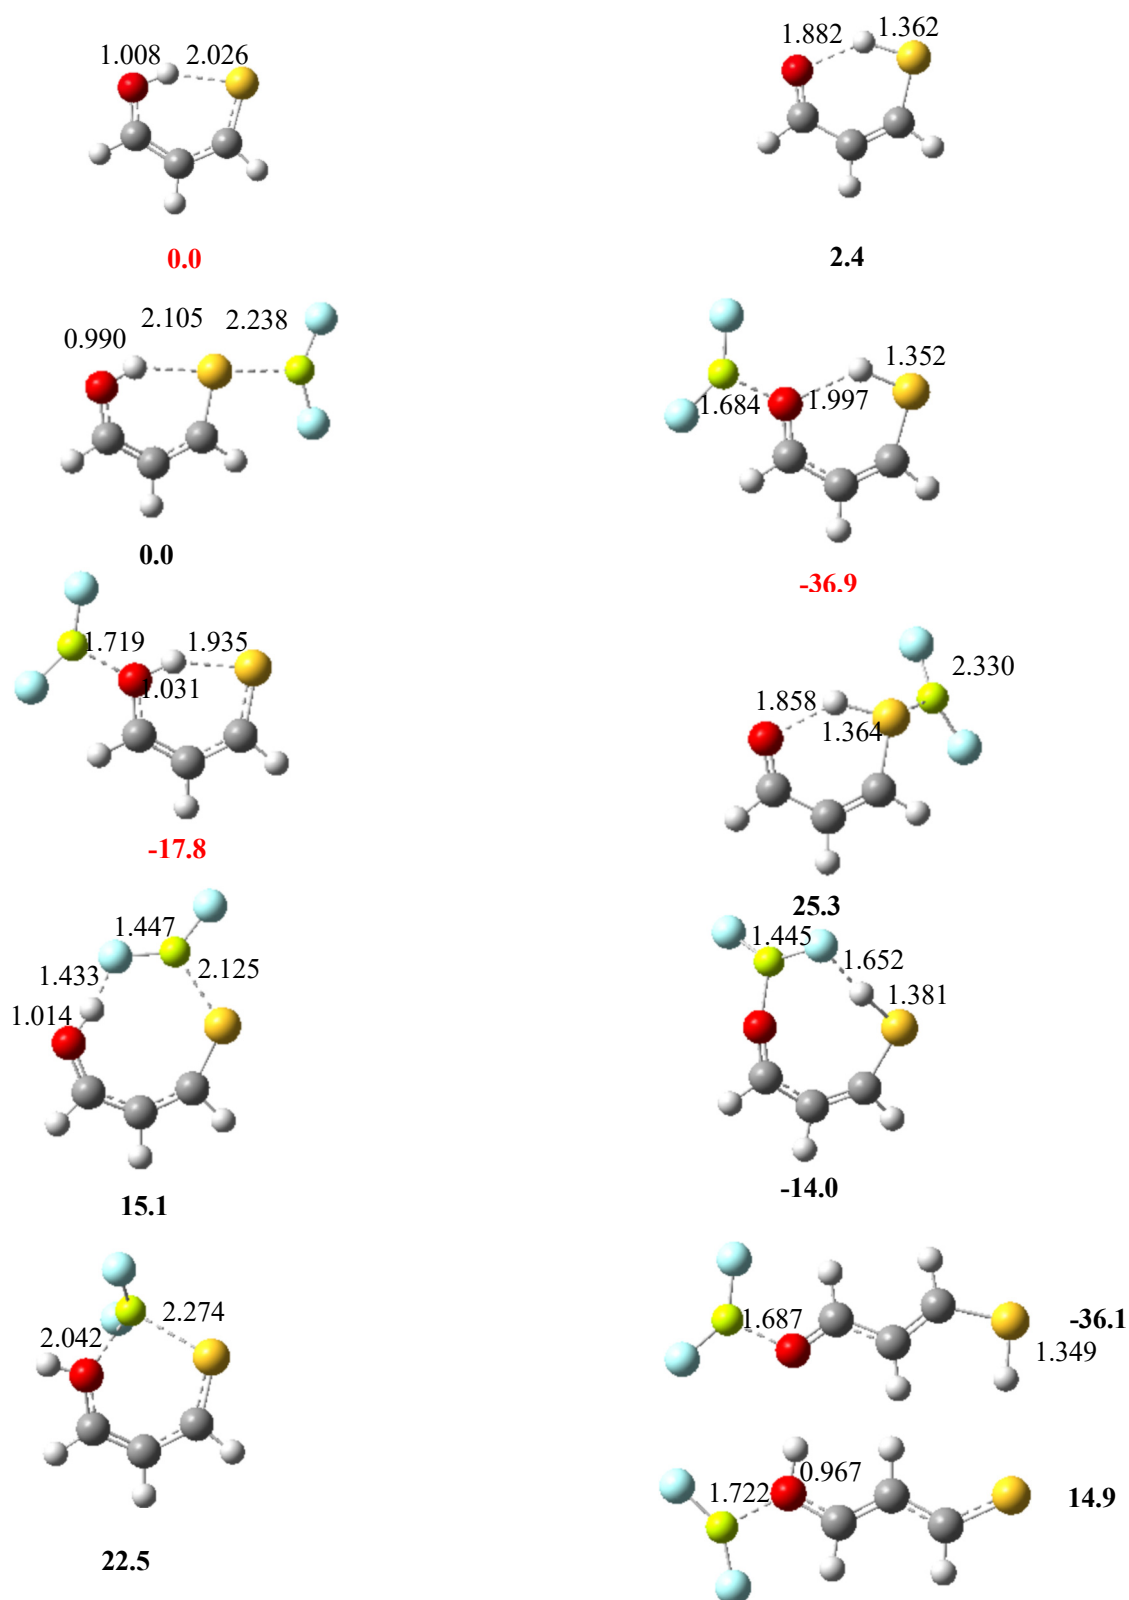

**Figure S1.** Optimized structures of the complexes between malonaldehyde-like (X = O, Y = S) with BeF<sub>2</sub>, showing the relative enthalpies (in kJ·mol<sup>-1</sup>) with respect to the global minimum (in red). Bond lengths are in Å. Atom color code: C, grey; H: white; O: red; S: mustard yellow; Be: lemon yellow; F: light blue.

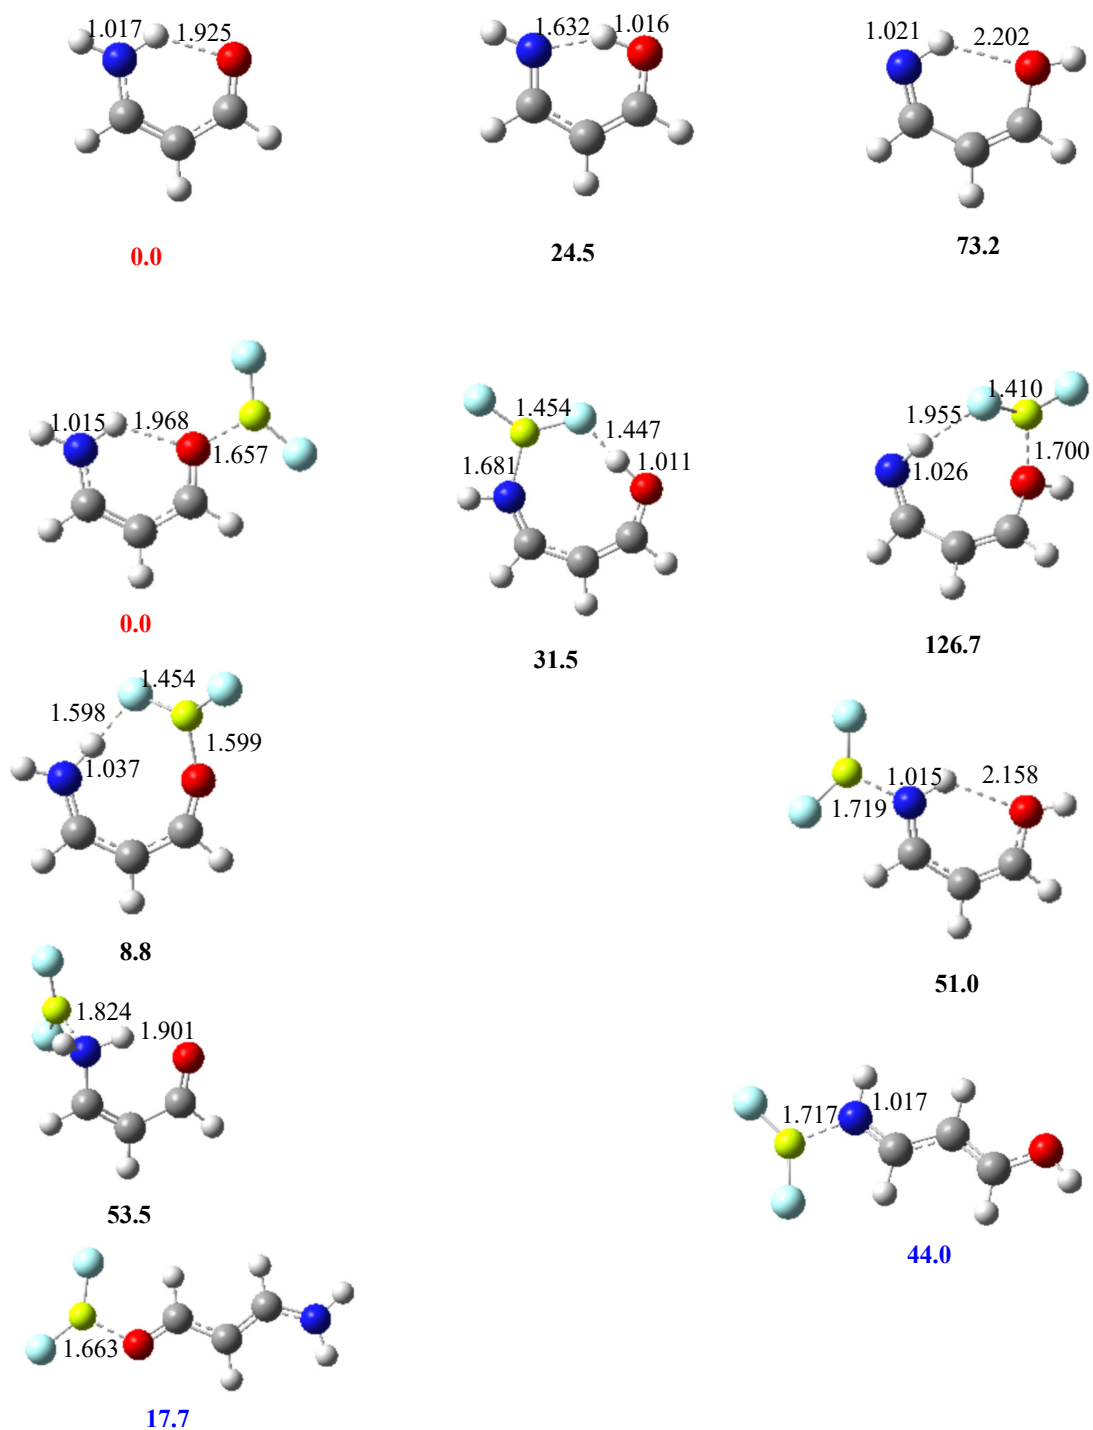

**Figure S2.** Optimized structures of the complexes between malonaldehyde-like (X = O, Y = NH) with BeF<sub>2</sub>, showing the relative enthalpies (in kJ·mol<sup>-1</sup>) with respect to the global minimum (in red). Bond lengths are in Å. Same conventions as in Figure S1.

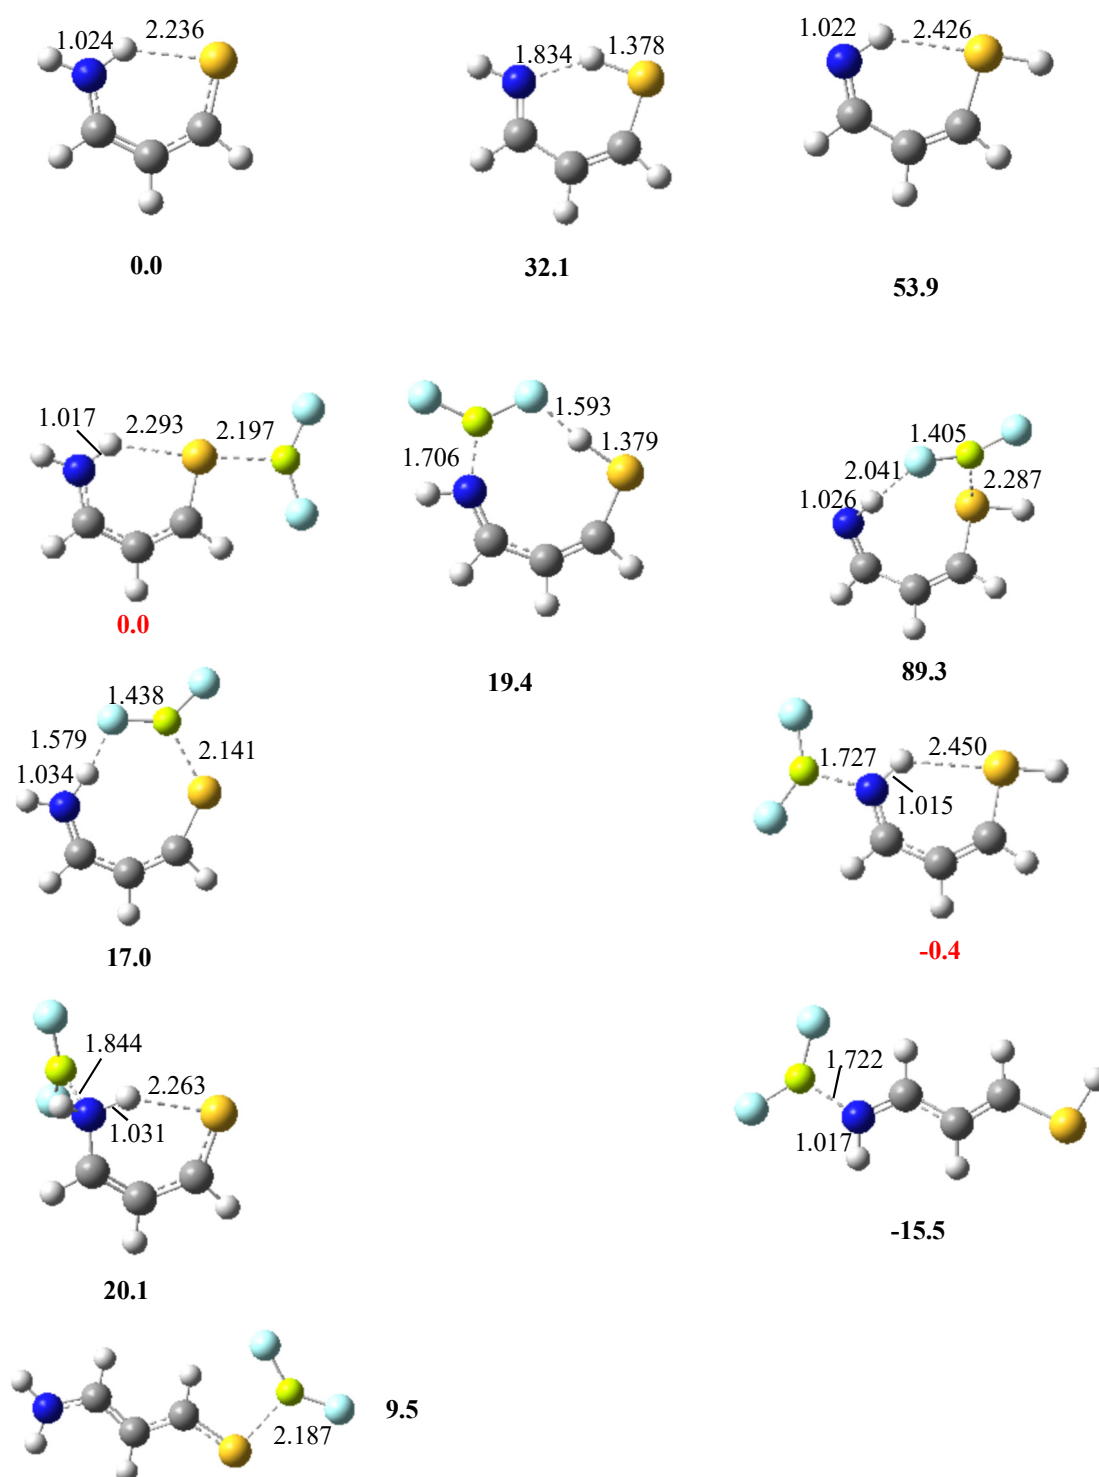

**Figure S3.** Optimized structures of the complexes between malonaldehyde-like (X = S, Y = NH) with BeF<sub>2</sub>, showing the relative enthalpies (in kJ·mol<sup>-1</sup>) with respect to the global minimum (in red). Bond lengths are in Å. Same conventions as in Figure S1.

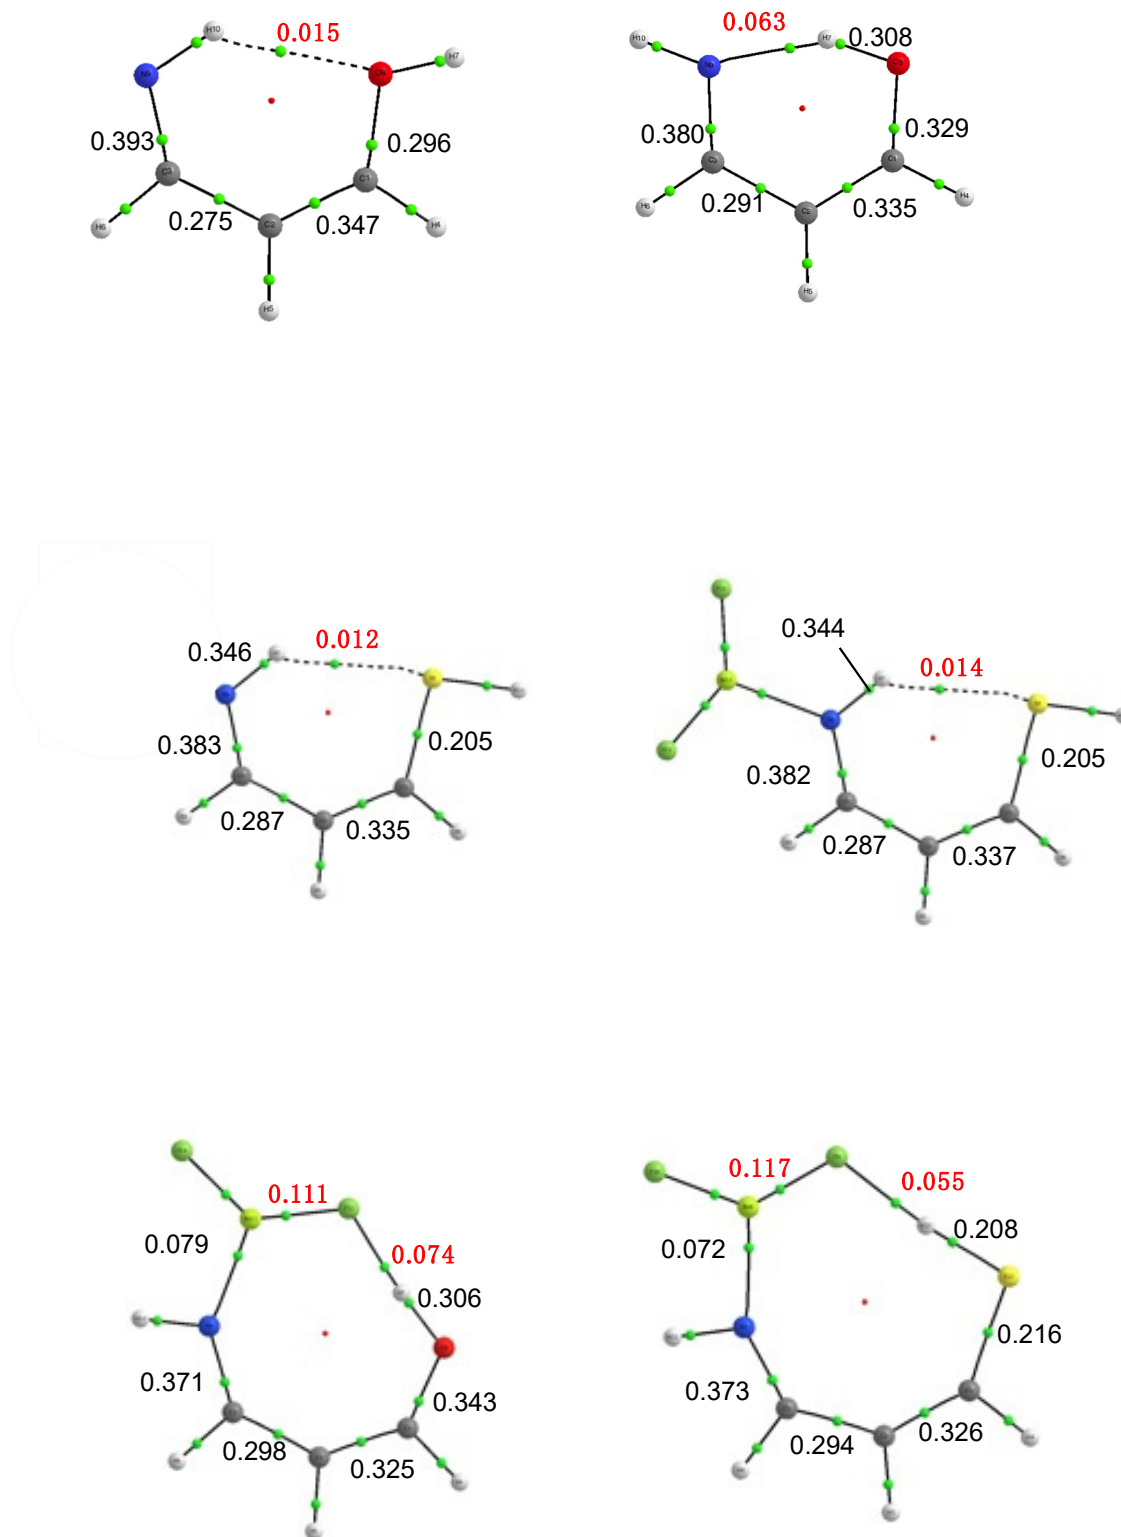

**Figure S4.** Molecular graphs of the malonaldehyde-like complexes in which X = O, S and Y = NH with BeF<sub>2</sub> molecule. Electron densities at the bond critical points in a.u.
